# Supplementary material for: Magnaporthe oryzae Effector AVR-Pii Helps to Establish Compatibility by Inhibition of the Rice NADP-Malic Enzyme Resulting in Disruption of Oxidative Burst and Host Innate Immunity
Source: PubMed Central journal article supplement — Mol Cells. 2016 May 3;39(5):426–38. doi: 10.14348/molcells.2016.0094 (PMC4870191; doi:10.14348/molcells.2016.0094), 2016-05-03
Supplement: molce-39-5-426-supple.pdf [file molce-39-5-426-supple.pdf]

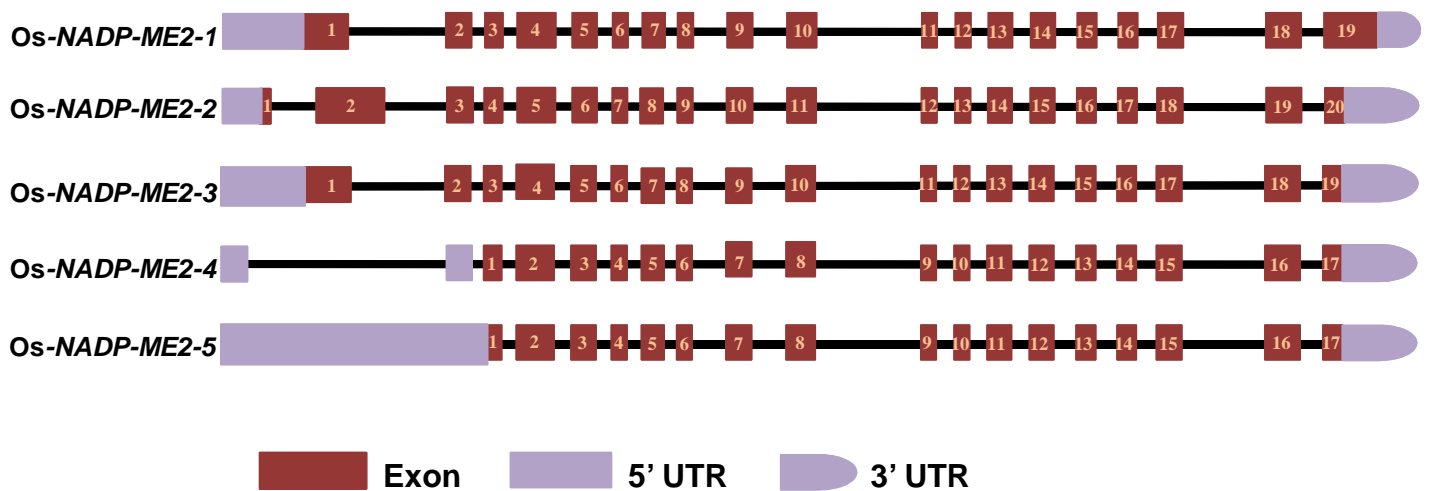

**Supplementary Fig. S1.** Schematic diagram of alternative splice forms of *Os-NADP-ME2*. Five different alternative splice forms of *Os-NADP-ME2* including the untranslated region (purple box), introns (black solid line), and exons (maroon box with numbers) are shown. Alternative splice forms are characterized based on the Rice Genome Annotation Project ([http://rice.plantbiology.msu.edu/cgi-bin/ORF\\_infopage.cgi](http://rice.plantbiology.msu.edu/cgi-bin/ORF_infopage.cgi)). The sequences are not drawn to scale.

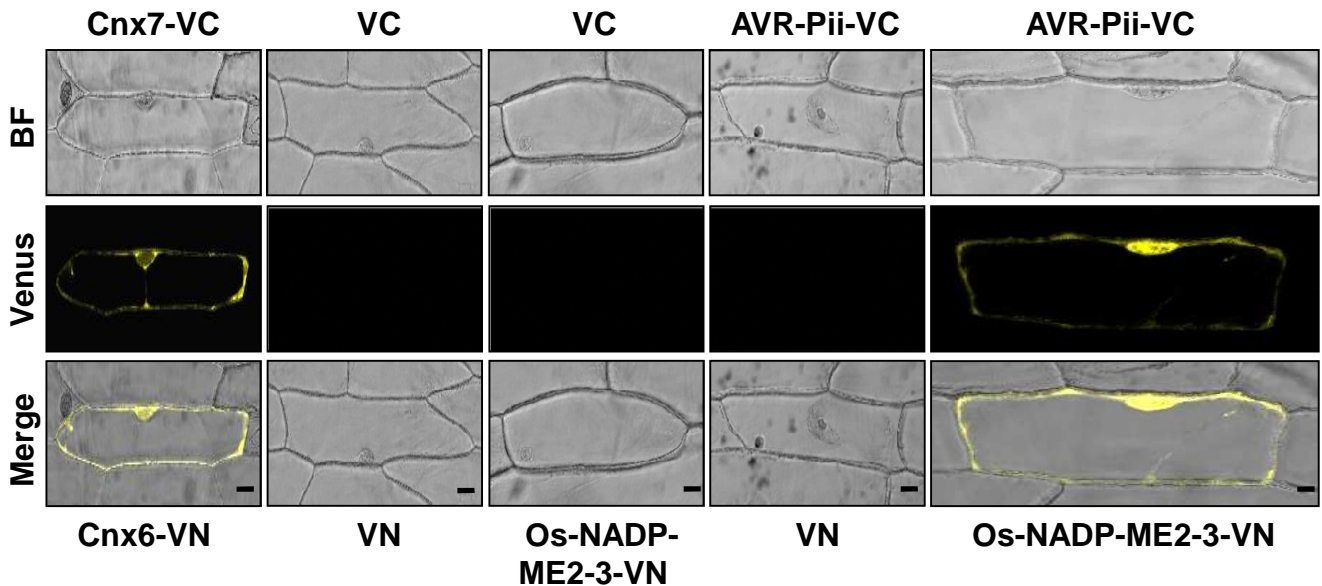

**Supplementary Fig. S2.** Interaction between AVR-Pii and Os-NADP-ME2-3 in onion epidermal cells using BiFC. *AVR-Pii* and *Os-NADP-ME2-3* DNA constructs and the positive and negative controls were bombarded into onion epidermal cells. The signals were detected using the Venus filter (Ex/Em: 488 nm/505–550 nm wavelength) of a confocal microscope (Leica, TCS SP5). *Arabidopsis* Cnx6 and Cnx7 proteins were used as positive controls, and the empty C- and N-terminal half Venus vectors were used as negative controls. Cnx6-VN, pEXP-VYNE(R)-Cnx6; Cnx7-VC, pEXP-VYCE(R)-Cnx7; VC, pDEST-VYCE<sup>®</sup><sub>GW</sub>; VN, pDEST-VYNE<sup>®</sup><sub>GW</sub>. Scale bar, 10 μm.

**A**

|            |                                                             |
|------------|-------------------------------------------------------------|
| AVR-Pii    | ATG CTT CCC ACT CCG GCC AGC CTG AAT GGC AAC ACT GAG GTC GCA |
| AVR-Pii-MT | ATG CTT CCC ACT CCG GCC AGC CTG AAT GGC AAC ACT GAG GTC GCA |
| AVR-Pii    | ACC ATC TCC GAC GTT AAA CTT GAG GCC CGC AGC GAC ACC ACT TAT |
| AVR-Pii-MT | ACC ATC TCC GAC GTT AAA CTT GCG GCC CGC AGC GCC ACC ACT TAT |
| AVR-Pii    | CAT AAA TGC TCC AAA TGC GGT TAT GGC AGC GAT GAT TCC GAC GCG |
| AVR-Pii-MT | CAT AAA TGC TCC AAA TGC GGT TAT GGC AGC GCT GCT TCC GCC GCG |
| AVR-Pii    | TAT TTT AAT CAT AAA TGC AAC TAA                             |
| AVR-Pii-MT | TAT TTT AAT CAT AAA TGC AAC TAA                             |

**B**

|            |                            |                 |            |     |      |      |      |  |
|------------|----------------------------|-----------------|------------|-----|------|------|------|--|
|            |                            | E23A            | D27A       |     | D41A | D42A | D44A |  |
|            |                            | ↓               | ↓          |     | ↓    | ↓    | ↓    |  |
| AVR-Pii    | MLPTPASLNGNTEVATISDVKLEARS | DTTYHKCSKCGYGS  | DDSDAYFNH  | KCN | 52   |      |      |  |
| AVR-Pii-MT | MLPTPASLNGNTEVATISDVKLAARS | SATTYHKCSKCGYGS | SAASAAYFNH | KCN | 52   |      |      |  |

**Supplementary Fig. S3.** Site-directed mutagenesis sites within AVR-Pii sequences. Site-directed mutagenesis sites within AVR-Pii sequence. Site-directed mutagenesis was performed as described in the Materials and Methods section. (A) Nucleotide sequence alignment of AVR-Pii and mutated AVR-Pii (AVR-Pii-MT). The nucleotides in red color represented the mutated nucleotide from the AVR-Pii sequence. Five different sites were chosen for mutagenesis as shown by numbers 1, 2, 3, 4 and 5 in AVR-Pii sequence. (B) Amino acid sequence alignment of AVR-Pii and AVR-Pii-MT. The mutated sites are shown by arrows.

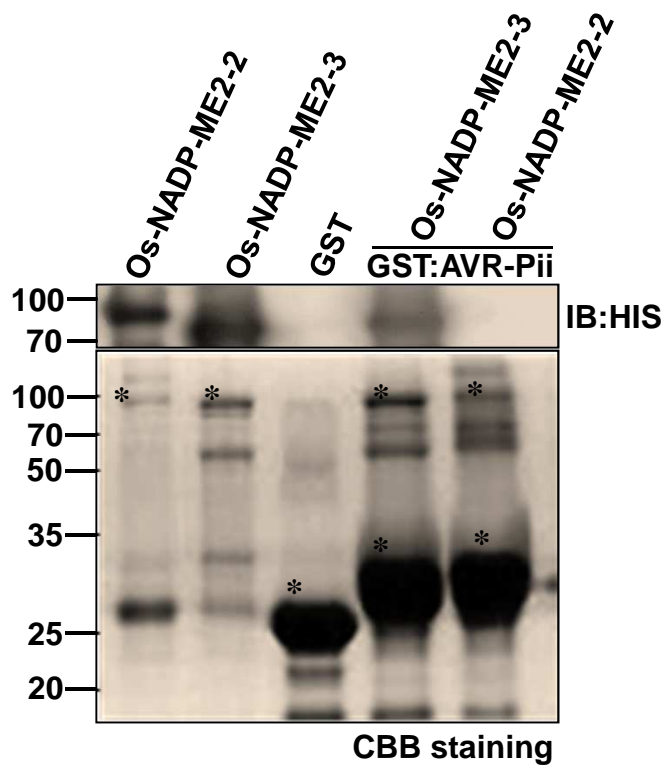

**Supplementary Fig. S4.** The interaction between AVR-Pii and Os-NADP-ME2-3 is specific. *In vitro* GST pull-down assay shows that GST-tagged AVR-Pii interacts only with Os-NADP-ME2-3. Both input (Os-NADP-ME2-3 and Os-NADP-ME2-2) and pull-down samples were subjected to CBB staining (lower panel) and immunoblotting (upper panel) using anti-His antibody (1:1000; ABM Inc. GO20). The asterisk (\*) represents His-tagged Os-NADP-ME2-2, Os-NADP-ME2-3 (upper), and GST alone as well as GST tagged AVR-Pii (lower). IB, Immunoblotting; CBB, Coomassie Brilliant Blue.

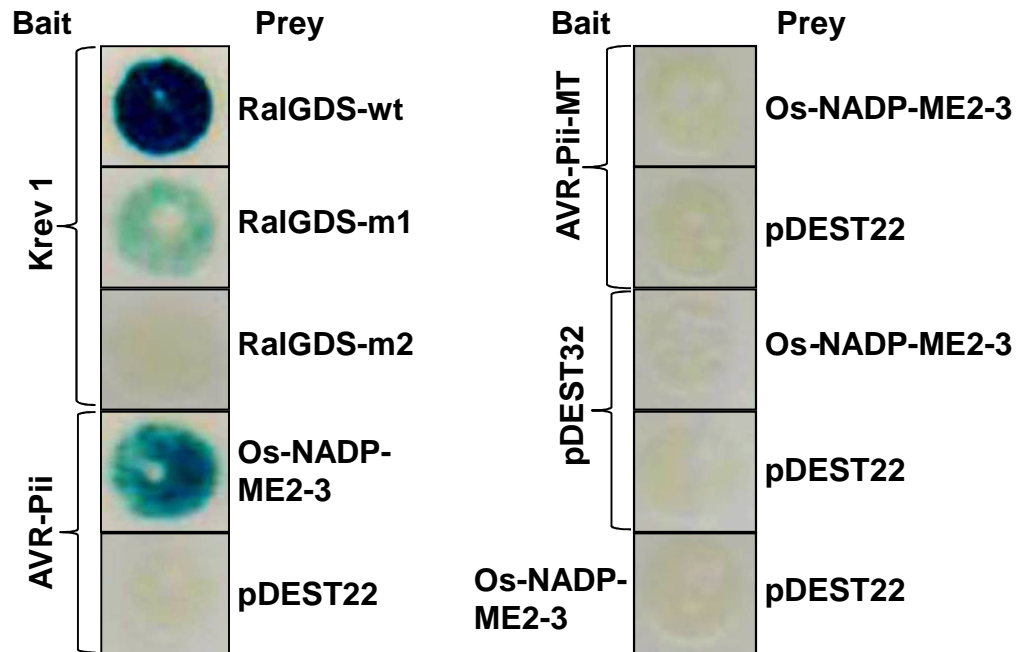

**Supplementary Fig. S5.** AVR-Pii mutant fails to interact with Os-NADP-ME2-3. Os-NADP-ME2-3 interacts with AVR-Pii in the yeast two-hybrid system, but it failed to interact with mutated AVR-Pii (AVR-Pii-MT). BD-AVR-Pii (bait) and BD-AVR-Pii-MT (bait) were co-transformed with AD-Os-NADP-ME2-3 (prey), and the X-gal assay was performed. Similarly, bait and prey protein were co-transformed with AD-empty and BD-empty vectors, respectively, as negative controls. Controls used were as follows: strong (pEXP32/Krev1 + pEXP22/RaIGDS-wt); weak (pEXP32/Krev1 + pEXP22/RaIGDS-m1); and absent (pEXP32/Krev1 + pEXP22/RaIGDS-m2). BD-empty vector, pDEST32; AD-empty vector, pDEST22.

A

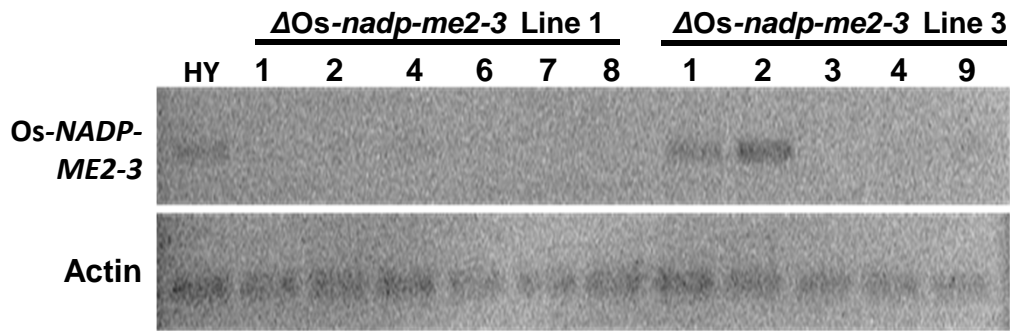

B

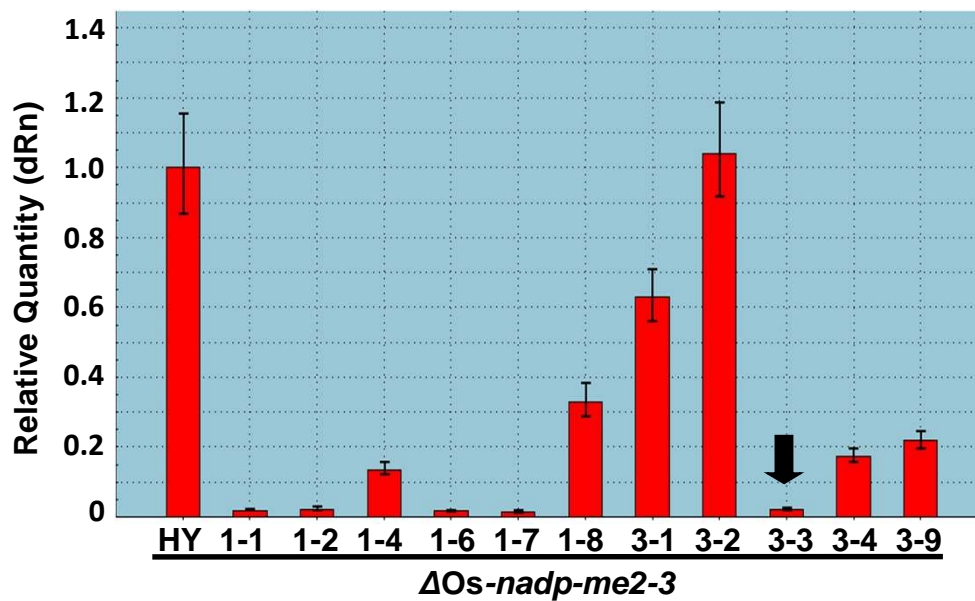

**Supplementary Fig. S6.** Transcript analysis of *Os-NADP-ME2-3* in HY and  $\Delta Os-nadp-me2-3$  mutants using RT-PCR and quantitative RT-PCR (qPCR). Transcript analysis of 11 different  $\Delta Os-nadp-me2-3$  mutant lines and the wild type (HY) were performed by RT-PCR (A) and real-time PCR (qPCR) (B). Actin and ubiquitin primers were used as internal controls.  $\Delta Os-nadp-me2-3$  (line 3-3) was selected and used for further experimental analysis.

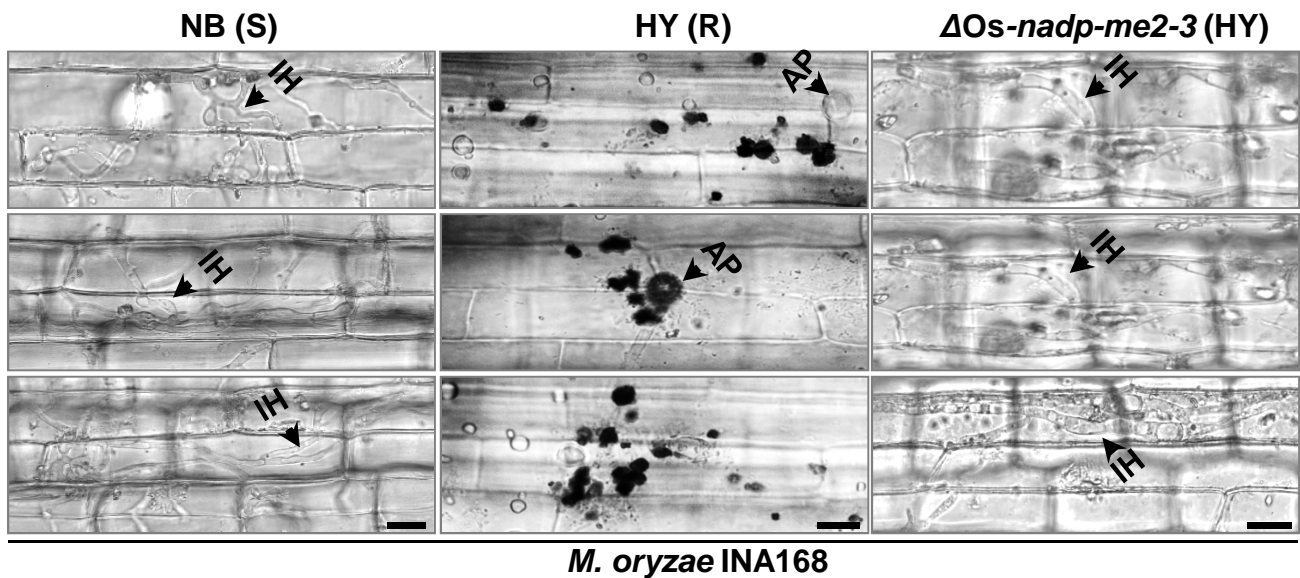

**Supplementary Fig. S7.** Dead appressorial and hyphal debris were observed on the surface of resistant HY sheath cells after *M. oryzae* inoculation. The remains of oxidized-type dead hyphae and appressorial debris were observed only on the surface of resistant HY sheath cells after inoculation with *M. oryzae* INA168 at 34–48 hpi, whereas successful colonization was observed in susceptible NB and  $\Delta Os-nadp-me2-3$ . AP, appressorium; IH, invasive hyphae. Scale bars, 10  $\mu$ m

TCGAATAAT CAATATCGTA TCCGAGGGGC TCAAGTCTTG TATACTCGAG GCAATGACAT GACCGACCAG CGTTGGAAAC  
 TTCAAACATG AACGATGATG ATGACAATGT AAGATCTTCC GAACCAAAAC TCGTCGCATA TTGTTCAGGA AGAGCTGCCC  
 GGCAAGCCGT AAAGGAATAT TATTGTTTCTG GCTCTAGACT AACGTCAAAG TGTTTACTTC CCAATCTTCA AGAAACCTTA  
 TAGGCTCAAA TATCGACACT AACCCAACCT TGATGTACGC AACATCTTCT CGGTCCAGGT CCCGTCCAG AATCAAACAT  
 TCAATCCTGA CTTTCATCTC CTCCTGACCT CCTCTACCGT CAATCTGACT CCCTGCCACG TCCCCACCGC TATGCTCCAG  
 GAATTC AAGG CCACTA TCCTA CGAGCTCGTC CTCCCCTTCC GTCCAAAAGC CGCCATTTTG CGAGTCAGTA TCTCCGTCTA  
 upstream 1346 forward

CCCAACTCTC TGGGCTGGTG GAGTTCGATG TCGGGGAGTT CGGACTGCTG GACAAGTTTT CAGAGGTTGA AACGCGGCGT  
 AGCCTCTCAA AATTTCTTTC CGCTGACACT GATGTAAGTG TAGCGGCCTC TCGTGTTC TCGCCCTCT GAGAGGCCG  
 ATGTCACCGA CGCGTTGTGG ATCAAACCTT CCGTGTCTGAA TCTTGGGAAG CAACTATGAG ATGCTTCTAC AACTAAGATA  
 upstream-2 inner reverse

GTAAATTCCT TCTCGGGAAT AGACGGGTAA ACTCTCCAGT CCGATTCTCT AGCTACGGGT TCTTCTGGCA ATGTCCAGAC  
 AAGGCATTGC CGCCCTCGA AATCTCCCAT TTGGAATTTT GRTGGCATCA TGTTGTTATC GTCAAACCAG CTCATGACAC  
 TGACAGTTTC GGGAGCTTCT TCCTCATCCA TTCGACTATG CGATGGCCGA AAACGACAAA GAATCCGGGT GCGTCCACGA  
 upstream-2 outer forward

ACAGACAGAC TCGCGT GCTT TATTGGCCG TATGGATTAC TTTGACTTT TCTTCAATTA TCTTTATTTT AAGTATCGAT  
 GTTTTTATA GGTTCGCGT TCCTCTTTT GATTAAATAC TTAAGTATTG TGGTAGATAT CCGCTGACTG GGGGCAACAT  
 TGTTGGATT TAAAGTACA TATATAGAAA CGAAAATAAG TGAAAAAGA AGAACAAGAG TAAGGGTTAT TAATTACACG  
 ACTAAATGTG GTAATTTAGC TATGTTATAA CCAGGCAAGC ACTACAAATA GCCCAGGGCA ATCAGGAAGA GGCCGATATG  
 TTACGATTGA ATAATAAAAT ATTTTATAAA CGTGCATTG GATGTAAATT GTAAATTATG CATTGAGCT CCTCTGCTT  
 upstream-1 inner reverse

TATTAACAGA AATGTTTTTA AACAGGTAC CTAATGCAA TTCTATATT TTTATGCGGA TTTATGCAGG CCCAAATCCG  
 TAGGAAATAC TATTAGTTAT AATAATATAA AAACCTCGGC TTCTGTATA TTAAGTATA ATTCTTTTC TTCCTCTT  
 ATATTTTCA TCTTAAAAC AAACATTTAA ATTCTGCTA TTGCAATTATA TGCAATCGGA ATCGCAGCAC TTCCACTCC GGCCAGCCTG  
 upstream-1 outer forward

AATGGCAACA CTGAGGTCGC AACCATCTCC GACGTAAAC TTGAGGCCG CAGCGACACC ACTTATCATA AATGCTCAA  
 ATGCGTTAT GGCAGCGATG ATTCCGACGC GTATTTAAT CATAAATGCA ACTAA

**Supplementary Fig. S8.** The genomic structure of the *AVR-Pii* original promoter and coding sequences. The promoter region (1602 bp) was recovered from *M. oryzae* genomic DNA by inverse PCR as described in the Materials and Methods section. Retrotransposon MAGGY (red) is located 1136 bp upstream of the *AVR-Pii* start codon. The coding region of *AVR-Pii* is shown in blue. The primers used for inverse PCR are underlined (purple). The promoter used for *AVR-Pii:mCherry* expression vector construction was 947 bp, as shown in green. The start and stop codons are marked in black squares.



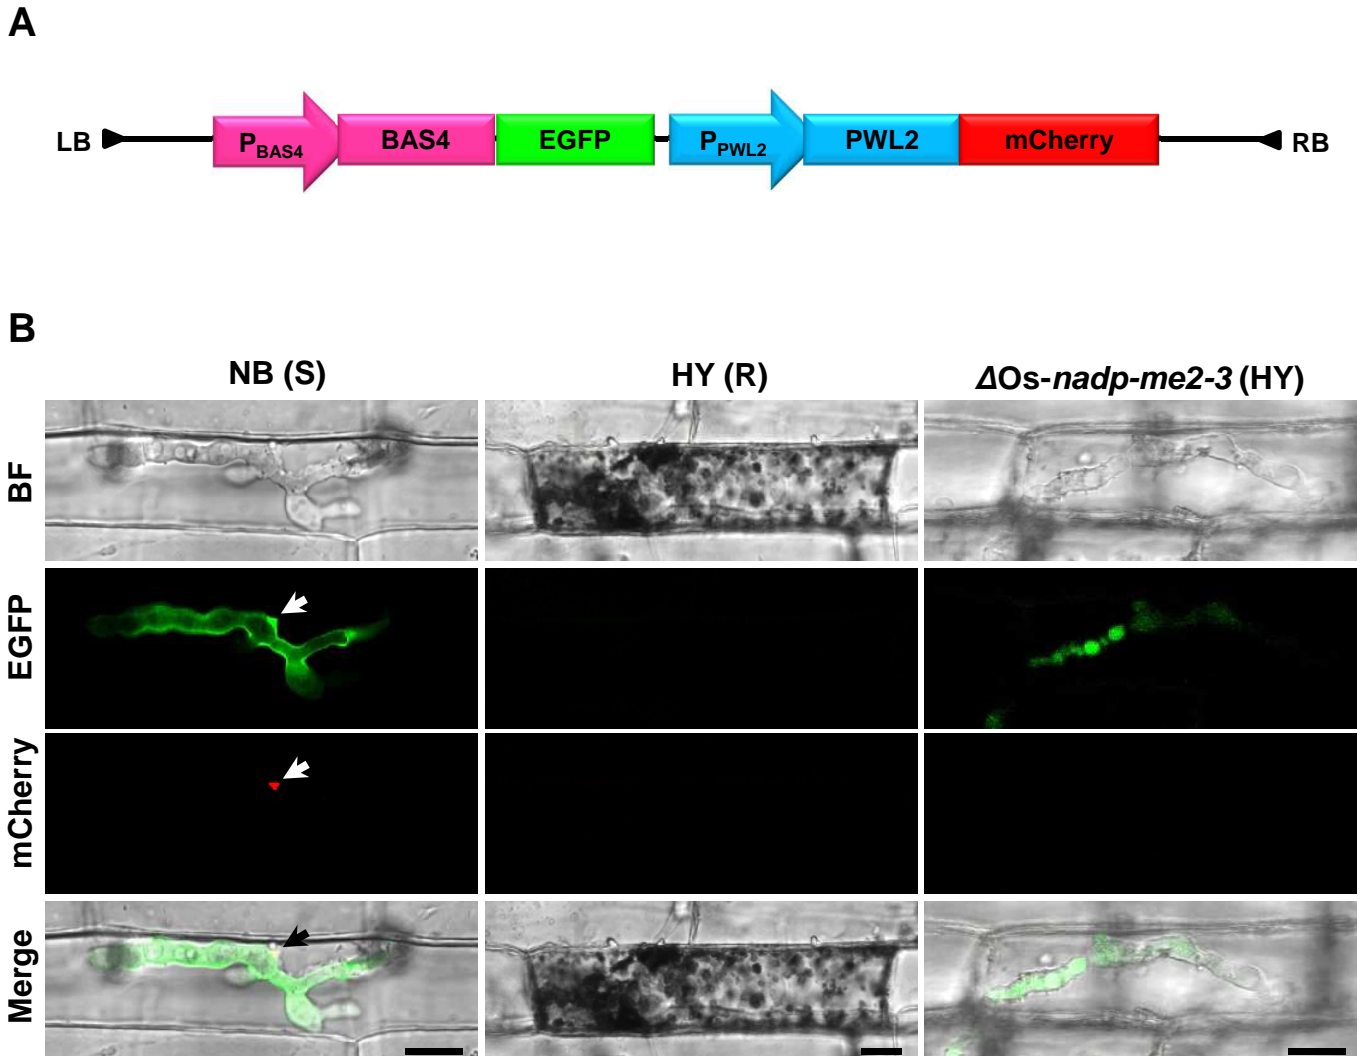

**Supplementary Fig. S9.** Differential regulation of the effectors was visualized using two BAS4 and PWL2-effector expression cassettes. (A) Schematic representation of plasmid pBV551 containing BAS4:EGFP and PWL2:mCherry as described in the Materials and Methods section. (B) Expression of BAS4 and PWL2 was observed in susceptible NB, where BAS4 appeared uniformly as a bright outline in the invasive hyphae, and PWL2 accumulated locally in the BIC (white arrow) at 34 to 48 hpi. In contrast, expression of BAS4 appeared in invasive hyphae, but PWL2 accumulation was not detected in the  $\Delta Os-nadp-me2-3$  mutant. In addition, both BAS4 and PWL2 were not observed in HY, indicating no viable hyphae. BIC, biotrophic interfacial complex; S, susceptible; R, resistant. Scale bars, 10  $\mu$ m.

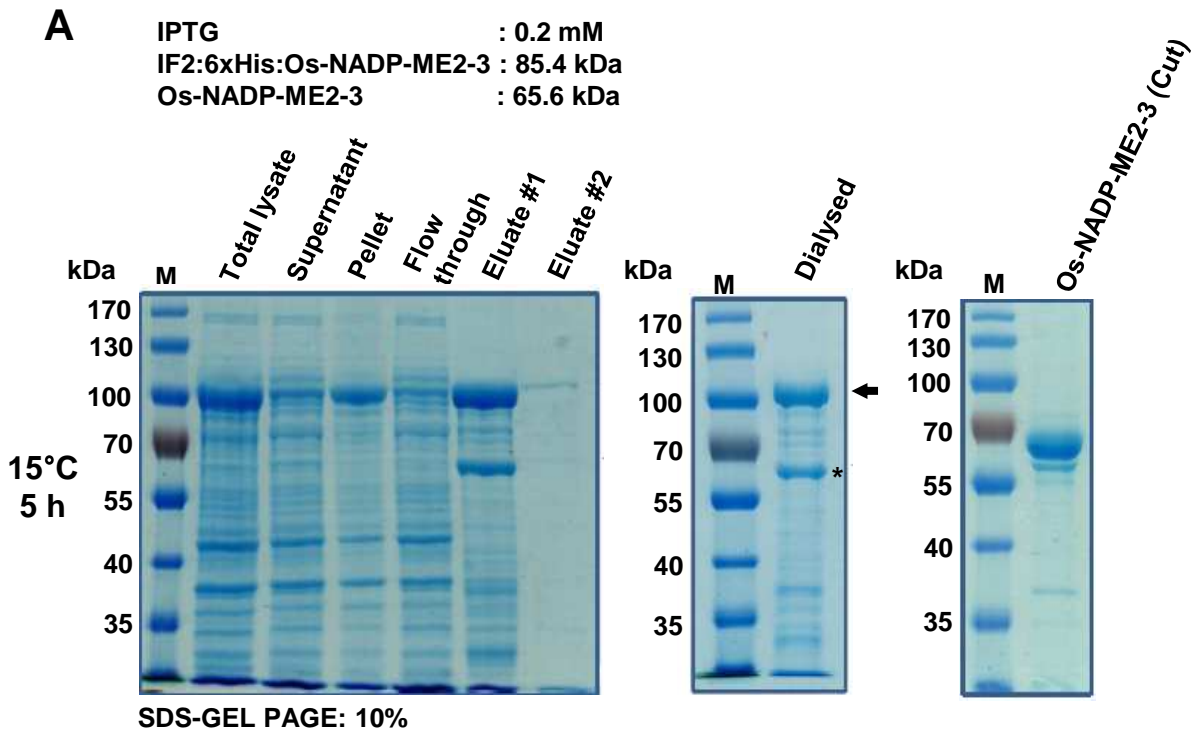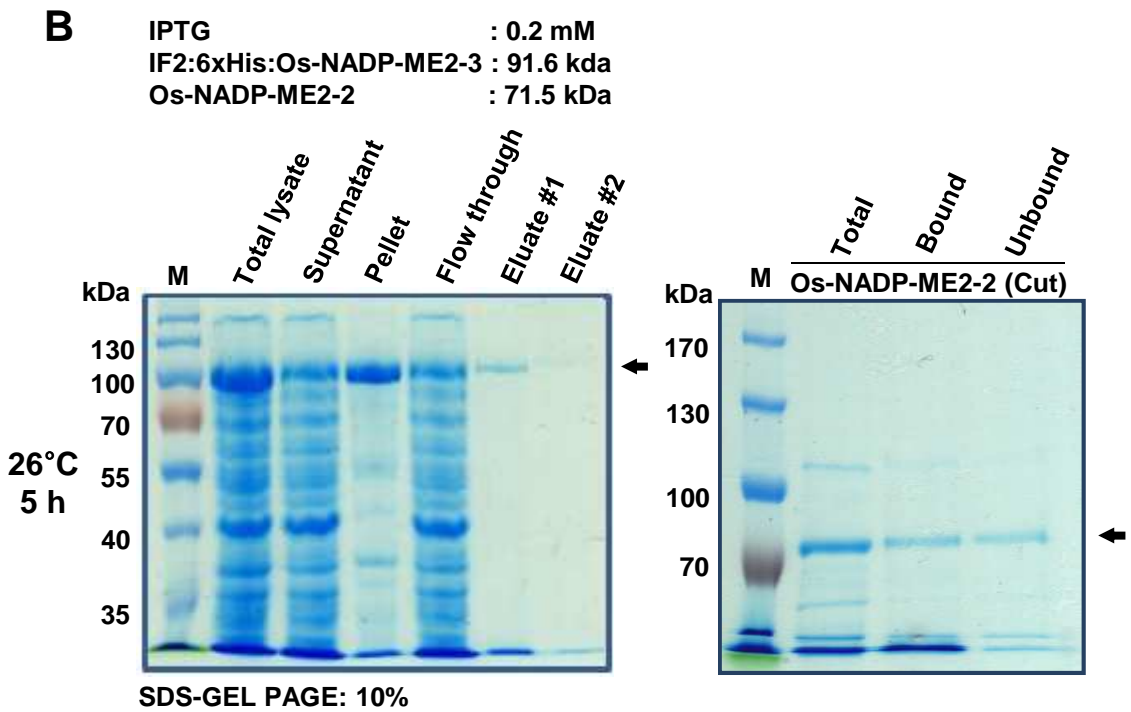

**Supplementary Fig. S10.** Expression, and purification of N-terminal IF2 and 6×His-tagged OsNADP-ME2-3 and Os-NADP-ME2-2. The pET28a vector was used to express Os-NADP-ME2-3 and Os-NADP-ME2-2 proteins, which provide the N-terminal IF2 and 6×His followed by the thrombin proteolytic site. The total mass of these protein constructs (including the fusion tag) was predicted to be 85.4 kDa for OsNADP-ME2-3 and 91.8 kDa for Os-NADP-ME2-2. (A), (B) Expression and purification of 6xHis:OsNADP-ME2-3 and 6xHis:OsNADP-ME2-2. The protein was induced at 0.2 mM IPTG at 15°C for 5 h and 26°C for 5 h, followed by purification from soluble lysate via nickel affinity chromatography and thrombin digestion. The arrow indicates the full-length protein, whereas the asterisk (\*) represents the truncated protein. The protein was run on 10% SDS-PAGE followed by CBB staining. M, protein size marker; P, pellet; S, supernatant; T, total protein.

**A**

IPTG : 0.2 mM  
GST:AVR-Pii : 32.56 kDa  
AVR-Pii : 5.66 kDa

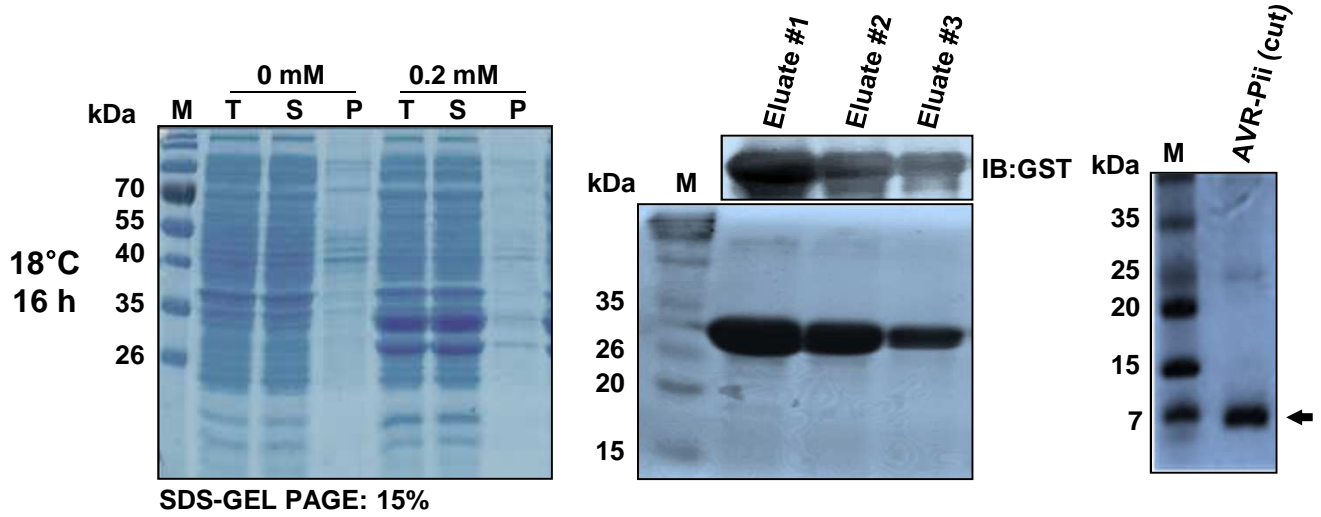**B**

IPTG : 0.2 mM  
GST:AVR-Pii-MT : 32.32 kDa  
AVR-Pii-MT : 5.42 kDa

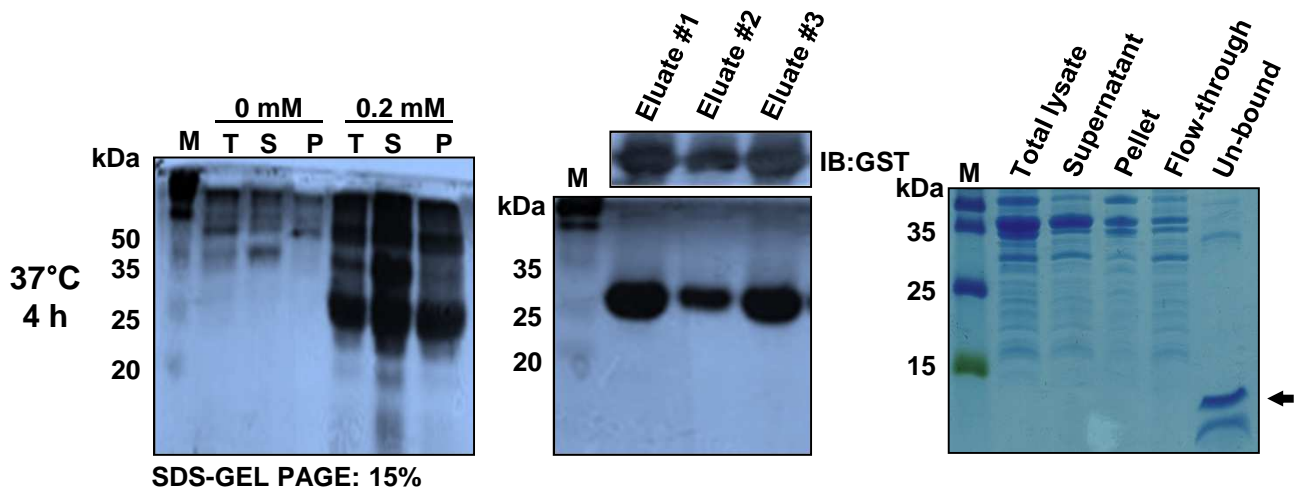

**Supplemental Figure S11.** Expression and purification of N-terminal GST fusion of AVR-Pii and AVR-Pii-MT. pGEX4T-1 was used to express AVR-Pii and AVR-Pii-MT proteins, which provides N-terminal GST followed by the thrombin proteolytic site. The total mass of these protein constructs (including the fusion tag) was predicted to be 32.56 kDa for AVR-Pii and 32.32 kDa for AVR-Pii-MT. (A), (B) Expression and purification of GST:AVR-Pii and GST:AVR-Pii-MT. The protein was induced at 0.2 mM IPTG at 18°C for 16 h and 37°C for 4 h, followed by purification using GST column chromatography from the supernatant and thrombin treatments. The protein was run on 15% SDS-PAGE followed by CBB staining and further confirmed by immunoblotting using anti-GST antibody (1:1000; Santa Cruz Biotechnology, Inc. B-14:sc-138). The purified AVR-Pii and AVR-Pii-MT, after thrombin treatment, were indicated by arrows. M, protein size marker; P, pellet; S, supernatant; T, total protein

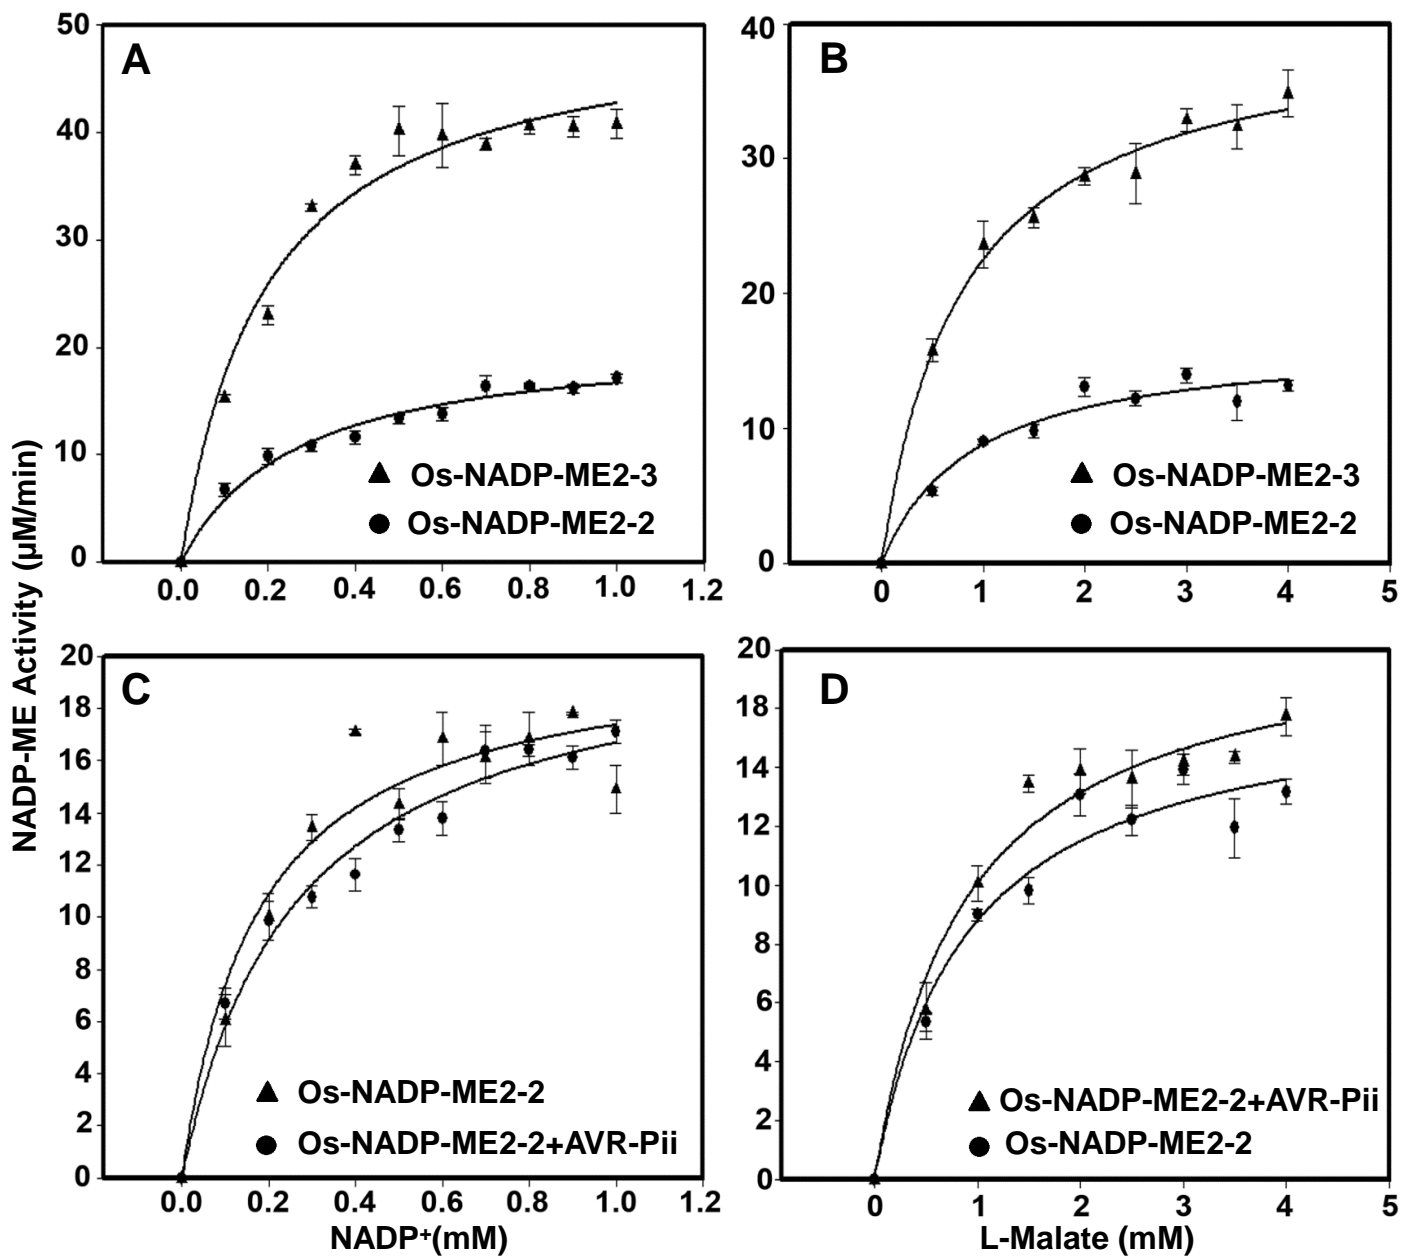

**Supplemental Figure S12.** Os-NADP-ME2-2 show extremely low enzyme activity compared with Os-NADP-ME2-3. (A), (B) The enzyme activity was determined at varying concentrations of  $\text{NADP}^+$  at 3.5 mM L-Malate or varying concentrations of L-Malate at 0.3 mM  $\text{NADP}^+$ . (C), (D) The activity of Os-NADP-ME2-2 in the presence of 10 nM AVR-Pii at varying concentrations of  $\text{NADP}^+$  and L-Malate with fixed levels of the other substrates. The results are presented as the means of triplicate determinants.

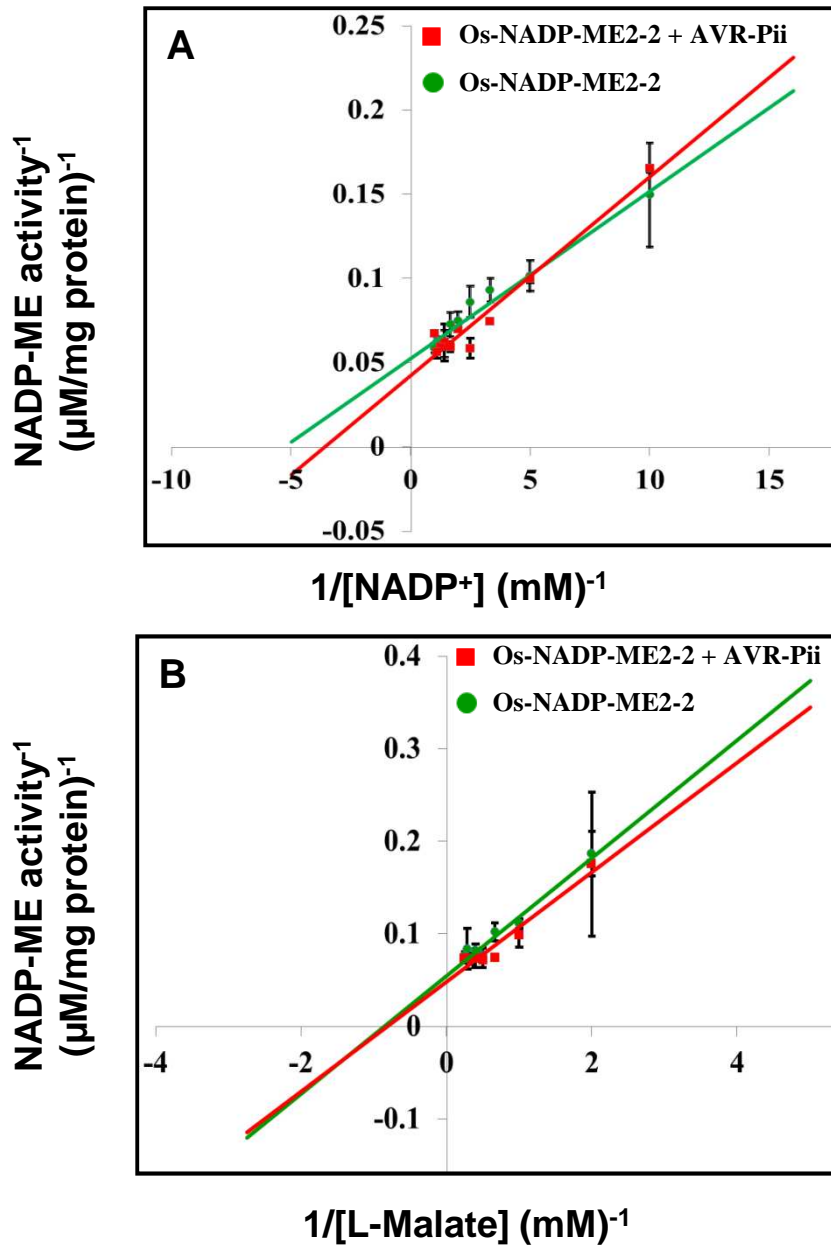

**Supplemental Figure S13.** Double reciprocal plot for inhibition of Os-NADP-ME2-2 activity by AVR-Pii. The activity of Os-NADP-ME2-2 was determined at different concentrations of NADP<sup>+</sup> (A) and L-malate (B) using the saturation levels of the other substrates. The results show that AVR-Pii does not affect the activity of Os-NADP-ME2-2, suggesting that AVR-Pii has no interaction with the Os-NADP-ME2-2 isoform. The results represent three independent determinants.

**Supplemental Table S1.** List of AVR-Pii interactors based on Y2H screening using rice cDNA library as prey.

| Bait    | Prey       |            |           |         |                      |
|---------|------------|------------|-----------|---------|----------------------|
|         | MSU locus  | Given name | Frequency | AA size | Protein localization |
| AVR-Pii | Os01g52500 | Os-NADP-ME | 22        | 496     | Cytoplasm            |
|         | Os02g30230 | Os-Exo70F2 | 6         | 689     | Cytoplasm            |
|         | Os04g31330 | Os-Exo70F3 | 1         | 688     | Nucleus              |
|         | Os08g41820 | Os-Exo70F4 | 2         | 510     | Nucleus              |

---

**Prey**

| Definition (KOME)                                                                                                                                                 | Definition (Genome annotation project)                             |
|-------------------------------------------------------------------------------------------------------------------------------------------------------------------|--------------------------------------------------------------------|
| Malate oxidoreductase, putative similar to malate oxidoreductase (NADP-dependent malic enzyme) GB:P34105 ( <i>Populus balsamifera</i> subsp. <i>trichocarpa</i> ) | NADP-dependent malic enzyme, putative, expressed                   |
| Exocyst subunit EXO70 family protein contains Pfam domain PF03081: Exo70 exocyst complex subunit;                                                                 | exo70 exocyst complex subunit domain containing protein, expressed |
| Exocyst subunit EXO70 family protein contains Pfam domain PF03081: Exo70 exocyst complex subunit;                                                                 | exo70 exocyst complex subunit domain containing protein, expressed |
| 68418.m06240 exocyst subunit EXO70 family protein contains Pfam domain PF03081: Exo70 exocyst complex subunit;                                                    | exo70 exocyst complex subunit domain containing protein, expressed |



**Supplemental Table S2.** Kinetic parameters of recombinant Os-NADP-ME2-3 and its isoform Os-NADP-ME2-2.

| <b>OsNADP-ME2-3</b>     |                                                              |                |                                          |                                                            |
|-------------------------|--------------------------------------------------------------|----------------|------------------------------------------|------------------------------------------------------------|
|                         | <b>Vmax (<math>\mu\text{Mmin}^{-1}\text{mg}^{-1}</math>)</b> | <b>Km (mM)</b> | <b>Kcat (<math>\text{S}^{-1}</math>)</b> | <b>Kcat/Km (<math>\text{mM}^{-1} \text{S}^{-1}</math>)</b> |
| <b>L-Malate</b>         | <b>39.84</b>                                                 | <b>0.76</b>    | <b>33.2</b>                              | <b>43.68</b>                                               |
| <b>NADP<sup>+</sup></b> | <b>56.17</b>                                                 | <b>0.26</b>    | <b>46.81</b>                             | <b>180.04</b>                                              |

| <b>OsNADP-ME2-2</b>     |                                                              |                |                                          |                                                            |
|-------------------------|--------------------------------------------------------------|----------------|------------------------------------------|------------------------------------------------------------|
|                         | <b>Vmax (<math>\mu\text{Mmin}^{-1}\text{mg}^{-1}</math>)</b> | <b>Km (mM)</b> | <b>Kcat (<math>\text{S}^{-1}</math>)</b> | <b>Kcat/Km (<math>\text{mM}^{-1} \text{S}^{-1}</math>)</b> |
| <b>L-Malate</b>         | <b>18.05</b>                                                 | <b>1.15</b>    | <b>15.04</b>                             | <b>13.08</b>                                               |
| <b>NADP<sup>+</sup></b> | <b>18.9</b>                                                  | <b>0.19</b>    | <b>15.75</b>                             | <b>82.89</b>                                               |

The indicate kinetic parameters are the mean of three separate determinants with no more than 10% standard deviation.

**Supplemental Table S3.** Inhibition pattern of Os-NADP-ME2-3 and Os-NADP-ME2-2.

The values are presented as the mean of triplicate determinations with no more than 10% standard deviation.

|                   | Os-NADP-ME2-3 |            | Os-NADP-ME2-2 |
|-------------------|---------------|------------|---------------|
| Varied Substrate  | AVR-Pii       | AVR-Pii-MT | AVR-Pii       |
| L-Malate          | Competitive   | N.I.       | N.I.          |
|                   | Ki = 7.6 nM   | N.I.       | N.I.          |
| NADP <sup>+</sup> | Competitive   | N.I.       | N.I.          |
|                   | Ki = 9.5 nM   | N.I.       | N.I.          |

**N.I. = No inhibition**

**Supplemental Table 4. Primers used in this study.**

| Primer Names                    |                 | Sequence                                                | Description                                           |              |
|---------------------------------|-----------------|---------------------------------------------------------|-------------------------------------------------------|--------------|
| (Os-NADP-ME2-1)<br>Os01g52500.1 | Forward         | AA AAA GCA GGC TGG TGG AGA GCA                          | Y2H Screening                                         |              |
|                                 | Reverse         | AGA AAG CTG GGT TTA CAA TAC AGG                         |                                                       |              |
| (Os-NADP-ME2-2)<br>Os01g52500.2 | Forward         | AA AAA GCA GGC TGG ATG CGC GCC                          |                                                       |              |
|                                 | Reverse         | AGA AAG CTG GGT TCA CCG GTA GTT                         |                                                       |              |
| (Os-NADP-ME2-3)<br>Os01g52500.3 | Forward         | AA AAA GCA GGC TGG ATG GAG AGC                          |                                                       |              |
|                                 | Reverse         | AGA AAG CTG GGT TCA CCG GTA GTT                         |                                                       |              |
| (Os-NADP-ME2-4)<br>Os01g52500.4 | Forward         | AA AAA GCA GGC TGG ATG CAT AAC                          |                                                       |              |
|                                 | Reverse         | AGA AAG CTG GGT TCA CCG GTA GTT                         |                                                       |              |
| AVR-Pii w/o SP                  | Forward         | AA AAA GCA GGC TGG CTT CCC ACT CCG                      |                                                       |              |
|                                 | Reverse         | AGA AAG CTG GGT TTA GTT GCA TTT                         |                                                       |              |
| pDONR                           | attB1           | GGG GAC AAG TTT GTA CAA AAA AGC AGG CT                  |                                                       | BiFC cloning |
|                                 | attB2           | GGG ACC ACT TTG TAC AAG AAA GCT GGG T                   |                                                       |              |
| AVR-Pii w SP (pEX33)            | Forward         | <u>TCTAGA</u> ATG CAA CTT TCC AAA ATT                   | AVR-Pii cloning                                       |              |
|                                 | Reverse         | <u>TCTAGA</u> GTT GCA TTT ATG ATT AAA                   |                                                       |              |
| AVR-Pii Promoter                | Forward-1       | <u>GGTACC</u> TTC GCT CTT TTG ATT AAA TAC               |                                                       |              |
|                                 | Forward-2       | <u>GTC GAC</u> TGT GGA TCA AAA CTT CCG TGT              |                                                       |              |
| AVR-Pii Promoter<br>Upstream    | 1-inner-Forward | ACT GAG GTC GCA ACC ATC TC                              | Inverse PCR for<br>AVR-Pii native<br>promoter cloning |              |
|                                 | 1-outer-Forward | CCA AAA TGC AAC TTT CCA AAA                             |                                                       |              |
|                                 | 1-inner-Reverse | AAG CAG AGG AGC TCA AAT GCA                             |                                                       |              |
|                                 | 1-outer-Reverse | TAT TTC CTA CGG ATT TGG GC                              |                                                       |              |
|                                 | 2-inner-Forward | GCT TTA TTT GGC CGT ATG GA                              |                                                       |              |
|                                 | 2-outer-Forward | TGA CAG TTT CGG GAG CTT C                               |                                                       |              |
|                                 | 2-inner-Reverse | CCA AGA TTC GAC ACG GAA GT                              |                                                       |              |
|                                 | 2-outer-Reverse | TGA GGA ATC CGA CTG GAG AG                              |                                                       |              |
|                                 | 1346-Forward    | CCA GGA ATT CAA GGC CAC TA                              |                                                       |              |
| BAS4-EGFP                       | Forward         | <u>GTC GAC</u> TCG AGT TCG CTC GGG GGC TGG              | BAS4-EGFP<br>construction                             |              |
|                                 | Reverse         | <u>GTC GAC</u> TCT AGT GAT TCT CTA GAT CAT              |                                                       |              |
| AVR-Pii-MT1                     | Forward         | C AGC gct gct TTC gcc GCG TAT TTT AAT CAT AAA TGC       | AVR-Pii site-directed<br>mutagenesis                  |              |
|                                 | Reverse         | CGC gcc GGA agc agc GCT GCC ATA ACC GCA TTT GGA G       |                                                       |              |
| AVR-Pii-MT2                     | Forward         | CTT ggc GCC CGC AGC gcc ACC ACT TAT CAT AAA TGC         |                                                       |              |
|                                 | Reverse         | GT ggc GCT GCG GGC cgc AAG TTT AAC GTC GGA GAT GGT      |                                                       |              |
| pGEX4T-1                        | pGEX3           | CCG GGA GCT GCA TGT GTC AGA GG                          |                                                       |              |
|                                 | pGEX5           | GGG CTG GCA AGC CAC GTT TGG TG                          |                                                       |              |
| AVR-Pii w/o SP                  | Forward         | GGT TCC GCG T <u>GGATCC</u> CTT CCC ACT CCG GCC AGC     | GST pull-down                                         |              |
|                                 | Reverse         | AGT CAC GAT <u>GCG GCC GC</u> T TAG TTG CAT TTA TGA TTA |                                                       |              |

|                                 |         |                                                       |                                                                     |
|---------------------------------|---------|-------------------------------------------------------|---------------------------------------------------------------------|
| (Os-NADP-ME2-3)<br>Os01g52500.3 | Forward | CGC GCG GCA GCC <u>ATA TG</u> G AGA GCA CCA TGA AG    | Os-NADP-ME2-3<br>protein expression<br>and sequence<br>confirmation |
|                                 | Reverse | GGT GGT GGT <u>GCT CGA G</u> TC ACC GGT AGT TGC GGT A |                                                                     |
|                                 | IntP    | GGGCTTGAGATCTTGCC                                     |                                                                     |
| (Os-NADP-ME2-2)<br>Os01g52500.2 | Forward | CGC GCG GCA GCC <u>ATA TG</u> CGC GCC CTT CGC TCC     | Os-NADP-ME2-2<br>protein expression<br>and sequence<br>confirmation |
|                                 | Reverse | GGT GGT GGT <u>GCT CGA</u> GTC ACC GGT AGT TGC GGT A  |                                                                     |
|                                 | IntP    | ATATTTAGCCGTCCTCAG                                    |                                                                     |
| (Os-NADP-ME2-3)<br>Os01g52500.3 | Forward | TAC AGC CCA CTT TAC CGC A ACT                         | RT-PCR                                                              |
|                                 | Reverse | CGA ACA TAG AAA CAG TAC CGA GAA                       |                                                                     |
| Actin gene                      | Forward | TCC ATC TTG GCA TCT CTC AG                            |                                                                     |
|                                 | Reverse | GTA CCC GCA TCA GCC ATC TG                            |                                                                     |
| Ubiquitin gene                  | Forward | GTG GTG GCC AGT AAG TCC TC                            |                                                                     |
|                                 | Reverse | GGA CAC AAT GAT TAG GGA TCA                           |                                                                     |
| (Os-NADP-ME2-3)<br>Os01g52500.3 | S4      | GTA AGT TGG CAA TGC CAA ATT TTG G                     | Rice NADP-ME2<br>deletion mutant<br>genotyping                      |
|                                 | RP      | GGC AAG CCC CTT GTT GTA GCG                           |                                                                     |
|                                 | RB      | TTG GGG TTT CTA CAG GAC GTA AC                        |                                                                     |

SP, signal Peptide; w/o, without; w, with
